# Supplementary material
Source: Elsevier journal article supplement (https://hal.science/hal-01322189v1/file/mmc1.pdf)
Supplement: mmc1 [file mmc1.pdf]

# SUPPORTING INFORMATION

## Crystal Structure, Physic-Chemical and Catalytic Properties Of Two Organic-Inorganic Hybrid Polyoxometalate-Based Lanthanide Complexes.

**Yassine Ghandour**<sup>a, \*</sup>, Mohamed Salah Belkhiria<sup>b</sup>, Carole Daignebonne<sup>c</sup>, Stéphane Freslon<sup>c</sup>, Olivier Guillou<sup>c</sup> and Thierry Roisnel<sup>d</sup>

<sup>a</sup>Laboratoire de Physico-chimie des Matériaux, University of Monastir, Faculty of Sciences, Avenue de l'environnement, 5019 Monastir, Tunisia.

<sup>b</sup>University of Sousse, High School of Sciences and Technology, Rue Lamine Abassi, 4011 Hammam Sousse, Tunisia.

<sup>c</sup>INSA, UMR 6226, Institut des Sciences Chimiques de Rennes, 35708 Rennes, France.

<sup>d</sup>Centre de Diffractométrie X, UMR 6226, Institut des Sciences Chimiques de Rennes1, Campus de Beaulieu, 35042 Rennes Cedex, France

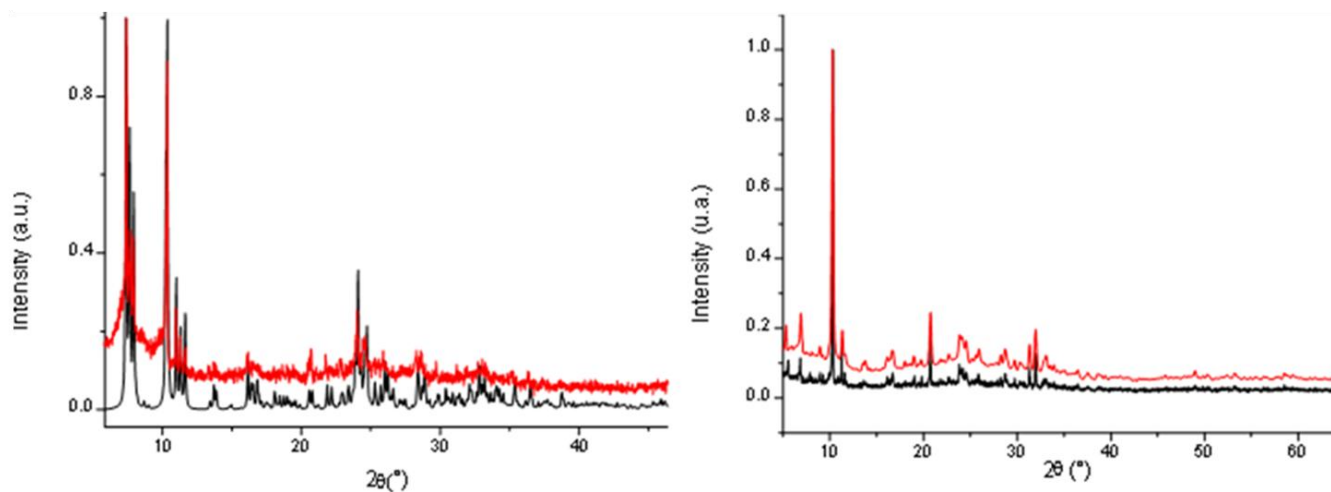

**Figure S1.** Experimental (red) and simulated (black) powder X-ray diffraction patterns for compounds **(1)** (Left) and **(2)** (Right).

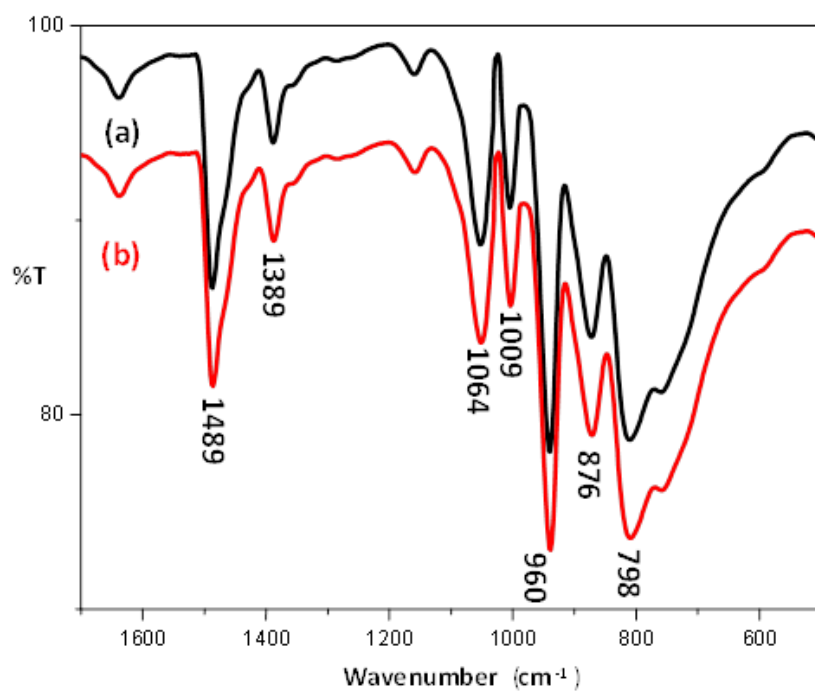

**Figure S2.** FT-IR spectra of  $[\text{Eu}(\text{C}_2\text{H}_6\text{SO})_8][\text{PMo}_{12}\text{O}_{40}]$  **(a)** and  $[\text{Er}(\text{C}_2\text{H}_6\text{SO})_8][\text{PMo}_{12}\text{O}_{40}].2(\text{C}_2\text{H}_6\text{SO}).1/2\text{H}_2\text{O}$  **(b)**

**Table S1.** Non typical contact interactions geometries in (1).

| D–H...A        | Symmetry codes | H...A distances(Å) | D...A distances (Å) | D–H...A angles (°) |
|----------------|----------------|--------------------|---------------------|--------------------|
| C6–H1B...O48   | 1+x,-1+y,z     | 2.55               | 3.354(2)            | 142                |
| C3–H2B...O46A  | 2-x,-y,1-z     | 2.58               | 3.433(16)           | 149                |
| C13–H4A...O8   | x,y,z          | 2.55               | 3.282(14)           | 133                |
| C2–H5B...O2    | x,y,z          | 2.48               | 3.424(14)           | 167                |
| C5–H7B...O22B  | 1-x,1-y,1-z    | 2.60               | 3.384(2)            | 140                |
| C1–H8B...O54A  | x,y,z          | 2.57               | 3.421(16)           | 148                |
| C9–H9C...O38   | 2-x,1-y,-z     | 2.54               | 3.348(13)           | 141                |
| C7–H10A...O36  | x,y,z          | 2.58               | 3.354(1)            | 138                |
| C15B–H6...O53  | 2-x,2-y,-z     | 2.57               | 3.350(3)            | 138                |
| C10–H11B...O18 | 1-x,1-y,-z     | 2.58               | 3.253(1)            | 127                |
| C12–H15A...O9  | x,1+y,z        | 2.53               | 3.463(15)           | 165                |

**Table S2.** Non typical contact interactions geometries in (2).

| D–H...A        | Symmetry codes      | H...A distances (Å) | D...A distances(Å) | D–H...A angles(°) |
|----------------|---------------------|---------------------|--------------------|-------------------|
| C13–H1C...S6   | x, y, z             | 2.85                | 3.727(2)           | 152               |
| C17–H3C...O47  | 2-x, -1/2+y, 1/2-z  | 2.44                | 3.293(2)           | 148               |
| C15–H6C...O50A | 1-x, -1/2+y, 1/2-z  | 2.52                | 3.352(3)           | 145               |
| C16–H7A...O39  | 1-x, -1/2+y, 1/2-z  | 2.53                | 3.343(3)           | 142               |
| C9–H10A...O26  | 1+x, y, z           | 2.57                | 3.519(2)           | 172               |
| C10–H11A...O12 | 1+x, 1/2-y, z-1/2   | 2.37                | 3.287(2)           | 160               |
| C3–H52A...O38  | x, y, z             | 2.60                | 3.458(3)           | 149               |
| C20–H58C...O16 | 1+x, 1/2-y, z-1/2   | 2.59                | 3.481(3)           | 155               |
| C11–H65B...O15 | 1+x, y, z           | 2.51                | 3.128(2)           | 122               |
| C5–H67B...O50A | 1+x, y, z           | 2.42                | 3.393(2)           | 146               |
| C6–H73C...O32  | 1-x, 1/2+ y, 1/2- z | 2.55                | 3.287(3)           | 134               |
| C8–H95B...OW1  | x, y, z             | 2.49                | 3.175(3)           | 128               |

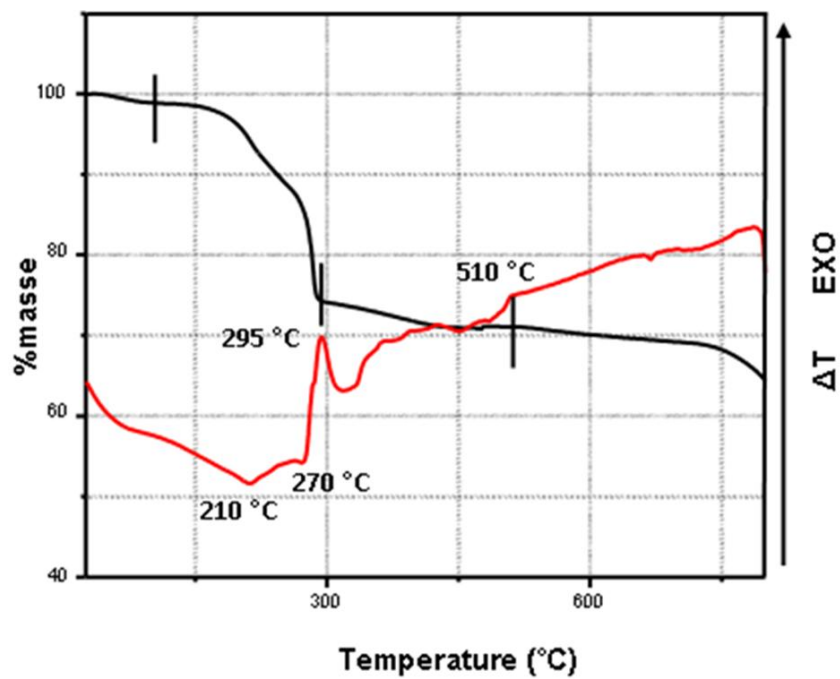

Figure S3. Thermal analyses of compound (1).

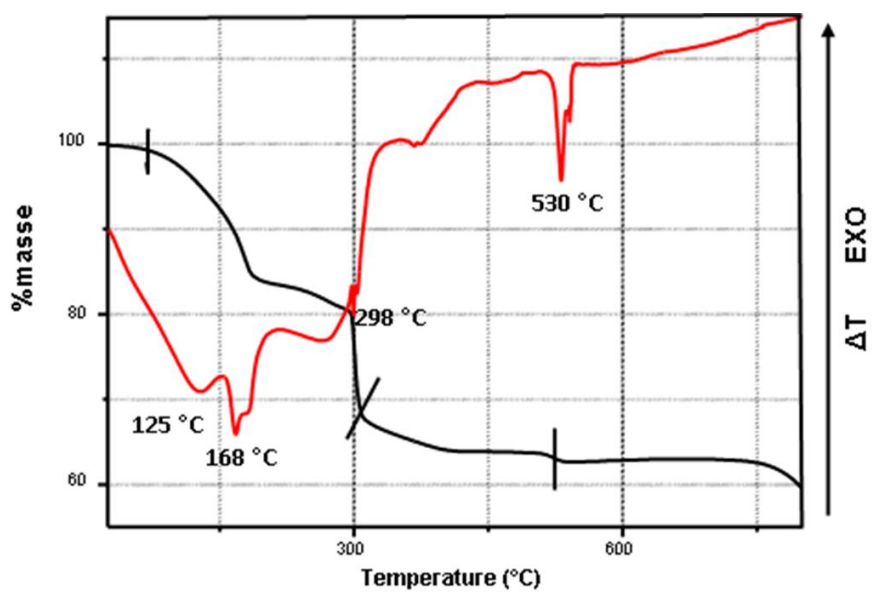

Figure S4. Thermal analyses of compound (2).
